# Supplementary material for: Insulators form gene loops by interacting with promoters in Drosophila
Source: Oxford University Press journal article supplement (doi:10.1242/dev.062836), 2011-08-23
Supplement: dev062836tables1.pdf [file dev062836tables1.pdf]

**Table S1. Primers used for RT-PCR experiments**

| Primer            | Sequence (5' to 3')    |
|-------------------|------------------------|
| yellow-RT-forward | TGTGACCCTGATCACCTTGG   |
| yellow-RT-reverse | TCGGGTATTCGGGAAAGCA    |
| white-RT-forward  | GCAAATGTCAGCACACGATCAT |
| white-RT-reverse  | GTGGGCTCATCGCAGATCA    |
| Ras64B-RT-forward | GAGGGATTCTGCTCGTCTTCG  |
| Ras64B-RT-reverse | GTCGCACTTGTTACCCACCATC |
