# Supplementary material for: Insulators form gene loops by interacting with promoters in Drosophila
Source: Oxford University Press journal article supplement (doi:10.1242/dev.062836), 2011-08-23
Supplement: dev062836tables2.pdf [file dev062836tables2.pdf]

**Table S2. Primers used for PCR in X-ChIP experiments for DNA fragments from the genome or transgenic constructs**

| Primer                     | Sequence (5' to 3')       |
|----------------------------|---------------------------|
| 1A2-forward                | CTGCAAGCTAGATCCACCTG      |
| 1A2-reverse                | CTTCGTCTACCGTTGTGC        |
| RpL32-forward              | CAGGCCCAAGATCGTGAAGAAGCG  |
| RpL32-reverse              | GTTCTCTTGAGAACGCAGGCGACC  |
| 62D-forward                | TGATACCAGGCGAACAGAAATC    |
| 62D-reverse                | TTTGGGCTTGGTGAGAACAG      |
| eve-prom-forward           | GCTGTCCCGCTCGCACCT        |
| eve-prom-reverse           | TGCGTCTGTGATTCAAAGTTGGC   |
| yell-prom-forward          | AAATCATACCAAACCCAGCGAAAGG |
| yell-prom-reverse          | GTGTTCCGGTAATCAGGTGGCTT   |
| y-mid-forward              | GTGGCAAAGTGGAACATTTAAAGGC |
| y-mid-reverse              | AGTTTTTCCAATTGAGCCCAGCATT |
| Hsp70-forward              | ACGGCGCACTGTTCTCGTTG      |
| Hsp70-reverse              | GCTTGTTGAGCTGCGCTTGTTTG   |
| eve-prom-construct-forward | AAATCATACCAAACCCAGCGAAAGG |
| eve-prom-construct-reverse | TGCGTCTGTGATTCAAAGTTGGC   |
